# Supplementary material
Source: publisher figshare collection journal article supplement (https://sage.figshare.com/ndownloader/files/23612649)
Supplement: Supplementary file 1 [file 23612649]

Table 1A

*Predictors of Print Media (Online and Offline) and Websites*

|                                   | Model 1         |      | Model 2         |      | Model 3        |      | Model 4        |      |
|-----------------------------------|-----------------|------|-----------------|------|----------------|------|----------------|------|
|                                   | b               | SE   | b               | SE   | b              | SE   | b              | SE   |
| <i>Control variables</i>          |                 |      |                 |      |                |      |                |      |
| Gender<br>(1 = male, 2 = female)  | <b>-.117***</b> | .074 | <b>-.129***</b> | .069 | <b>-.083**</b> | .065 | <b>-.075*</b>  | .064 |
| Age                               | -.031           | .002 | -.027           | .002 | -.058          | .002 | -.048          | .002 |
| Education                         | <b>.246***</b>  | .014 | <b>.166***</b>  | .013 | <b>.139***</b> | .012 | <b>.122***</b> | .012 |
| R <sup>2</sup>                    | .08             |      |                 |      |                |      |                |      |
| <i>Planned behavior variables</i> |                 |      |                 |      |                |      |                |      |
| Evaluation of media coverage      |                 |      | <b>.082*</b>    | .059 | .026           | .056 | .019           | .055 |
| Subjective norm                   |                 |      | <b>.280***</b>  | .040 | .069           | .044 | .035           | .044 |
| Perceived behavioral control      |                 |      | <b>.111*</b>    | .044 | .060           | .042 | .031           | .042 |
| R <sup>2</sup>                    |                 |      | .20             |      |                |      |                |      |
| <i>Audience orientations</i>      |                 |      |                 |      |                |      |                |      |
| Intrinsic motivations             |                 |      |                 |      | <b>.327***</b> | .056 | <b>.263***</b> | .058 |
| Extrinsic motivations             |                 |      |                 |      | <b>.160***</b> | .048 | <b>.138***</b> | .048 |
| Attitudes toward science          |                 |      |                 |      | .047           | .047 | <b>.063*</b>   | .046 |
| R <sup>2</sup>                    |                 |      |                 |      | .32            |      |                |      |
| Active information seeking        |                 |      |                 |      |                |      | <b>.183***</b> | .033 |
| Total R <sup>2</sup>              |                 |      |                 |      |                |      | .34            |      |

*Note.* Linear regression, blockwise. Method: enter. Beta values are standardized  $\beta$  coefficients. SE = Standard error. \* $p \leq .05$ . \*\* $p \leq .01$ . \*\*\* $p \leq .001$ .

Table 2A

*Predictors of TV Use*

|                                   | Model 1        |      | Model 2        |      | Model 3        |      | Model 4        |      |
|-----------------------------------|----------------|------|----------------|------|----------------|------|----------------|------|
|                                   | b              | SE   | b              | SE   | b              | SE   | b              | SE   |
| <i>Control variables</i>          |                |      |                |      |                |      |                |      |
| Gender<br>(1 = male, 2 = female)  | .041           | .075 | .046           | .074 | .057           | .075 | .059           | .075 |
| Age                               | <b>.178***</b> | .002 | <b>.155***</b> | .002 | <b>.152***</b> | .002 | <b>.155***</b> | .002 |
| Education                         | -.046          | .014 | -.056          | .014 | -.065          | .014 | -.070          | .014 |
| R <sup>2</sup>                    | .03            |      |                |      |                |      |                |      |
| <i>Planned behavior variables</i> |                |      |                |      |                |      |                |      |
| Evaluation of media coverage      |                |      | <b>.144***</b> | .064 | <b>.104**</b>  | .065 | <b>.102*</b>   | .065 |
| Subjective norm                   |                |      | .059           | .044 | -.008          | .051 | -.019          | .051 |
| Perceived behavioral control      |                |      | <b>-.090*</b>  | .048 | <b>-.108**</b> | .048 | <b>-.117**</b> | .049 |
| R <sup>2</sup>                    |                |      | .06            |      |                |      |                |      |
| <i>Audience orientations</i>      |                |      |                |      |                |      |                |      |
| Intrinsic motivations             |                |      |                |      | .050           | .065 | .030           | .068 |
| Extrinsic motivations             |                |      |                |      | <b>.124**</b>  | .055 | <b>.117**</b>  | .056 |
| Attitudes toward science          |                |      |                |      | <b>.090*</b>   | .054 | <b>.095*</b>   | .054 |
| R <sup>2</sup>                    |                |      |                |      | .09            |      |                |      |
| Active information seeking        |                |      |                |      |                |      | .057           | .039 |
| Total R <sup>2</sup>              |                |      |                |      |                |      | .10            |      |

*Note.* Linear regression, blockwise. Method: enter. Beta values are standardized  $\beta$  coefficients. SE = Standard error. \* $p \leq .05$ . \*\* $p \leq .01$ . \*\*\* $p \leq .001$ .

Table 3A

*Predictors of Radio Use*

|                                   | Model 1        |      | Model 2        |      | Model 3        |      | Model 4        |      |
|-----------------------------------|----------------|------|----------------|------|----------------|------|----------------|------|
|                                   | b              | SE   | b              | SE   | b              | SE   | b              | SE   |
| <i>Control variables</i>          |                |      |                |      |                |      |                |      |
| Gender<br>(1 = male, 2 = female)  | .019           | .075 | .027           | .074 | .011           | .075 | .005           | .075 |
| Age                               | <b>.196***</b> | .002 | <b>.175***</b> | .002 | <b>.193***</b> | .002 | <b>.185***</b> | .002 |
| Education                         | -.027          | .014 | -.011          | .014 | -.009          | .014 | .005           | .014 |
| R <sup>2</sup>                    | .04            |      |                |      |                |      |                |      |
| <i>Planned behavior variables</i> |                |      |                |      |                |      |                |      |
| Evaluation of media coverage      |                |      | <b>.114**</b>  | .063 | <b>.096*</b>   | .065 | <b>.101*</b>   | .065 |
| Subjective norm                   |                |      | -.039          | .043 | -.005          | .051 | .022           | .051 |
| Perceived behavioral control      |                |      | <b>-.111**</b> | .048 | <b>-.111**</b> | .048 | <b>-.088*</b>  | .049 |
| R <sup>2</sup>                    |                |      | .06            |      |                |      |                |      |
| <i>Audience orientations</i>      |                |      |                |      |                |      |                |      |
| Intrinsic motivations             |                |      |                |      | <b>-.133**</b> | .065 | -.083          | .068 |
| Extrinsic motivations             |                |      |                |      | <b>.105*</b>   | .056 | <b>.122**</b>  | .056 |
| Attitudes toward science          |                |      |                |      | .064           | .054 | .051           | .054 |
| R <sup>2</sup>                    |                |      |                |      | .07            |      |                |      |
| Active information seeking        |                |      |                |      |                |      | <b>-.143**</b> | .039 |
| Total R <sup>2</sup>              |                |      |                |      |                |      | .09            |      |

*Note.* Linear regression, blockwise. Method: enter. Beta values are standardized  $\beta$  coefficients. SE = Standard error. \* $p \leq .05$ . \*\* $p \leq .01$ . \*\*\* $p \leq .001$ .

Table 4A

*Predictors of Social Media Use*

|                                   | Model 1         |      | Model 2         |      | Model 3         |      | Model 4         |      |
|-----------------------------------|-----------------|------|-----------------|------|-----------------|------|-----------------|------|
|                                   | b               | SE   | b               | SE   | b               | SE   | b               | SE   |
| <i>Control variables</i>          |                 |      |                 |      |                 |      |                 |      |
| Gender<br>(1 = male, 2 = female)  | -.037           | .069 | -.039           | .069 | -.027           | .070 | -.025           | .070 |
| Age                               | <b>-.407***</b> | .002 | <b>-.413***</b> | .002 | <b>-.421***</b> | .002 | <b>-.418***</b> | .002 |
| Education                         | <b>-.090*</b>   | .013 | <b>-.097*</b>   | .013 | <b>-.101**</b>  | .013 | <b>-.104*</b>   | .013 |
| R <sup>2</sup>                    | .20             |      |                 |      |                 |      |                 |      |
| <i>Planned behavior variables</i> |                 |      |                 |      |                 |      |                 |      |
| Evaluation of media coverage      |                 |      | -.055           | .059 | <b>-.084*</b>   | .060 | <b>-.085*</b>   | .060 |
| Subjective norm                   |                 |      | .067            | .040 | .023            | .047 | .016            | .048 |
| Perceived behavioral control      |                 |      | -.023           | .044 | -.029           | .045 | -.035           | .045 |
| R <sup>2</sup>                    |                 |      | .20             |      |                 |      |                 |      |
| <i>Audience orientations</i>      |                 |      |                 |      |                 |      |                 |      |
| Intrinsic motivations             |                 |      |                 |      | .048            | .060 | .034            | .063 |
| Extrinsic motivations             |                 |      |                 |      | .028            | .052 | .023            | .052 |
| Attitudes toward science          |                 |      |                 |      | <b>.089*</b>    | .050 | <b>.092*</b>    | .050 |
| R <sup>2</sup>                    |                 |      |                 |      | .21             |      |                 |      |
| Active information seeking        |                 |      |                 |      |                 |      | .041            | .036 |
| Total R <sup>2</sup>              |                 |      |                 |      |                 |      | .21             |      |

*Note.* Linear regression, blockwise. Method: enter. Beta values are standardized  $\beta$  coefficients. SE = Standard error. \* $p \leq .05$ . \*\* $p \leq .01$ . \*\*\* $p \leq .001$ .
